# Supplementary material
Source: HighWire-hosted journal article supplement (https://www.life-science-alliance.org/content/2/5/e201900478/F6)
Supplement: inline-supplementary-material-4 [file inline-supplementary-material-4.pdf]

CRMP2

AGE-CRMP2

Fig S3A

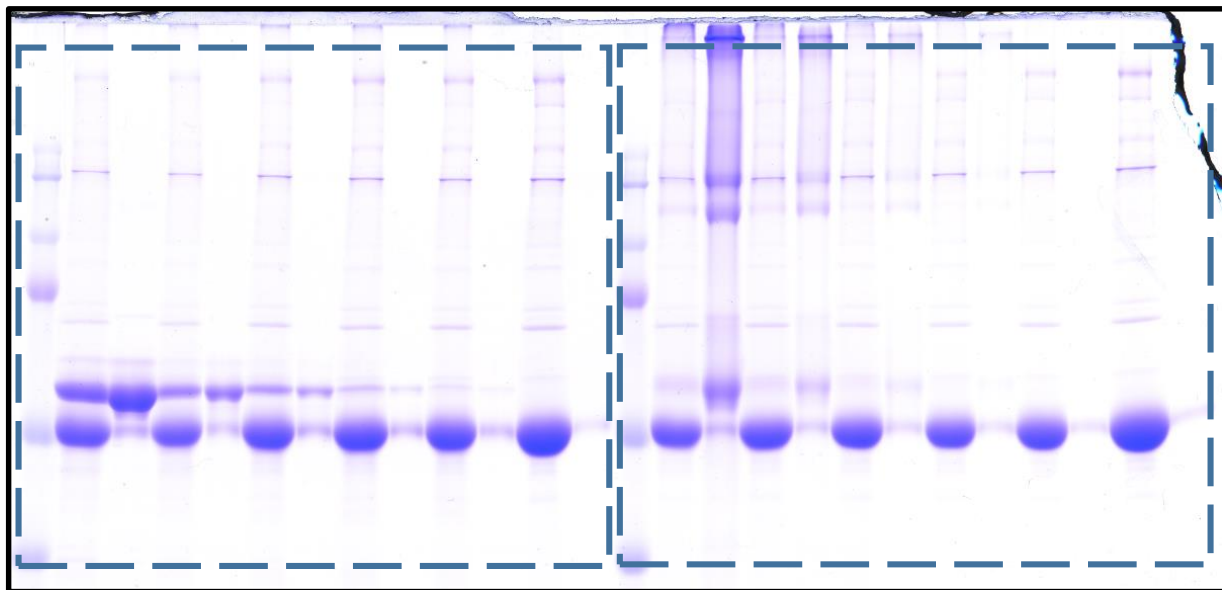

Cropped area

Cropped area

Figure S3 Toyoshima & Jiang et al.
